# Supplementary material
Source: MDPI journal article supplement (https://www.mdpi.com/2311-5637/8/12/665)
Supplement: s1 [file s1 › fermentation-1976028-supplementary.pdf]

**Supplementary materials for**

**Galactitol transport factor GatA relieves ATP supply restriction to  
enhance acid tolerance of *Escherichia coli* in the two-stage  
fermentation production of D-Lactate**

Jinhua Yang<sup>1,2</sup>, Zheng Peng<sup>1,2</sup>, Xiaomei Ji<sup>1,2</sup>, Juan Zhang<sup>1,2\*</sup> and Guocheng Du<sup>1,2\*</sup>

<sup>1</sup> Key Laboratory of Industrial Biotechnology, Ministry of Education, School of Biotechnology,  
Jiangnan University, Wuxi, 214122, China

<sup>2</sup> Science Center for Future Foods, Jiangnan University, Wuxi 214122, China

**\*Corresponding author:**

**Juan Zhang**

E-mail address: zhangj@jiangnan.edu.cn;

Phone number: +86-(510)-85918307

**Guocheng Du**

E-mail address: gcdu@jiangnan.edu.cn

**Titles and legends for the tables.**

Table S1 Strains and plasmids used in this study.

Table S2 Bioreactor experimental fermentation conditions.

Figure S1 Effect of different biomass during the transition from the growth phase to the acid production phase.

Figure S2 Intracellular ATP concentration and pH under itaconic and succinic acid lethal stress

Table S1 Strains and plasmids used in this study.

| Strains or plasmids       | Relevant property <sup>a</sup>                                           | Source             |
|---------------------------|--------------------------------------------------------------------------|--------------------|
| Strains                   |                                                                          |                    |
| <i>E. coli</i> K12 MG1655 | 33                                                                       | Laboratory storage |
| <i>E. coli</i> LBBE317    | 10                                                                       | Laboratory storage |
| <i>E. coli</i> (Vector)   | MG1655 containing Vector, Amp <sup>r</sup>                               | This study         |
| <i>E. coli</i> (GatA)     | MG1655 containing Vector/GatA, Amp <sup>r</sup>                          | This study         |
| <i>E. coli</i> LBBE317P   | <i>E. coli</i> LBBE317 containing Vector, Amp <sup>r</sup>               | This study         |
| <i>E. coli</i> LBBE317PGA | <i>E. coli</i> LBBE317 containing Vector/GatA, Amp <sup>r</sup>          | This study         |
| Plasmids                  |                                                                          | This study         |
| pTrc99a                   | Amp <sup>r</sup> ; inducible expression vector with <i>lacZ</i> promoter | This study         |
| Vector/GatA               | Amp <sup>r</sup> ; pTrc99a derivative containing a <i>gatA</i> gene      | This study         |

<sup>a</sup> Amp<sup>r</sup>, ampicillin resistant

Table S2 Bioreactor experimental fermentation conditions.

| Fermentation mode                      | Grow phase                      |                 | D-lactate production phase      |                 | Cultivation temperature (°C) | Glucose added (g) |
|----------------------------------------|---------------------------------|-----------------|---------------------------------|-----------------|------------------------------|-------------------|
|                                        | Aeration (L·min <sup>-1</sup> ) | Agitation (rpm) | Aeration (L·min <sup>-1</sup> ) | Agitation (rpm) |                              |                   |
| Single-phase fermentation <sup>a</sup> | -                               | -               | 0                               | 100             | 37                           | 300               |
| Two-phase fermentation <sup>b</sup>    | 3                               | 400-600         | 0-1                             | 100-200         |                              |                   |

<sup>a</sup> No air was pumped throughout the fermentation process, and the interior of the container was kept in a microaerobic state by stirring at 100 rpm. All glucose is added at the beginning.

<sup>b</sup> Air is pumped into the bioreactor at a rate of 3 L·min<sup>-1</sup> to initiate growth. The dissolved O<sub>2</sub> (DO) concentration is maintained above 30 % by stirring at 400-600 rpm. Glucose was added in three batches to keep the residual glucose concentration above 10 g·L<sup>-1</sup>.

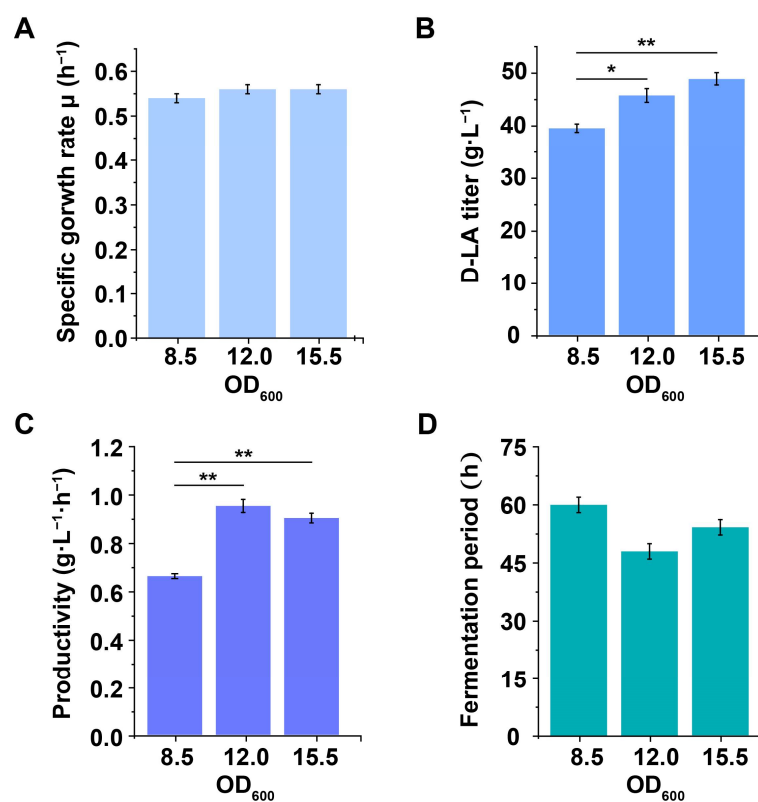

Figure S1. Effect of different biomass during the transition from the growth phase to the acid production phase. (A) Aerobic specific growth rate. (B) Titer of D-LA accumulation. (C) D-LA productivity. (D) Fermentation period. \*,  $p < 0.05$ ; \*\*,  $p < 0.01$ .

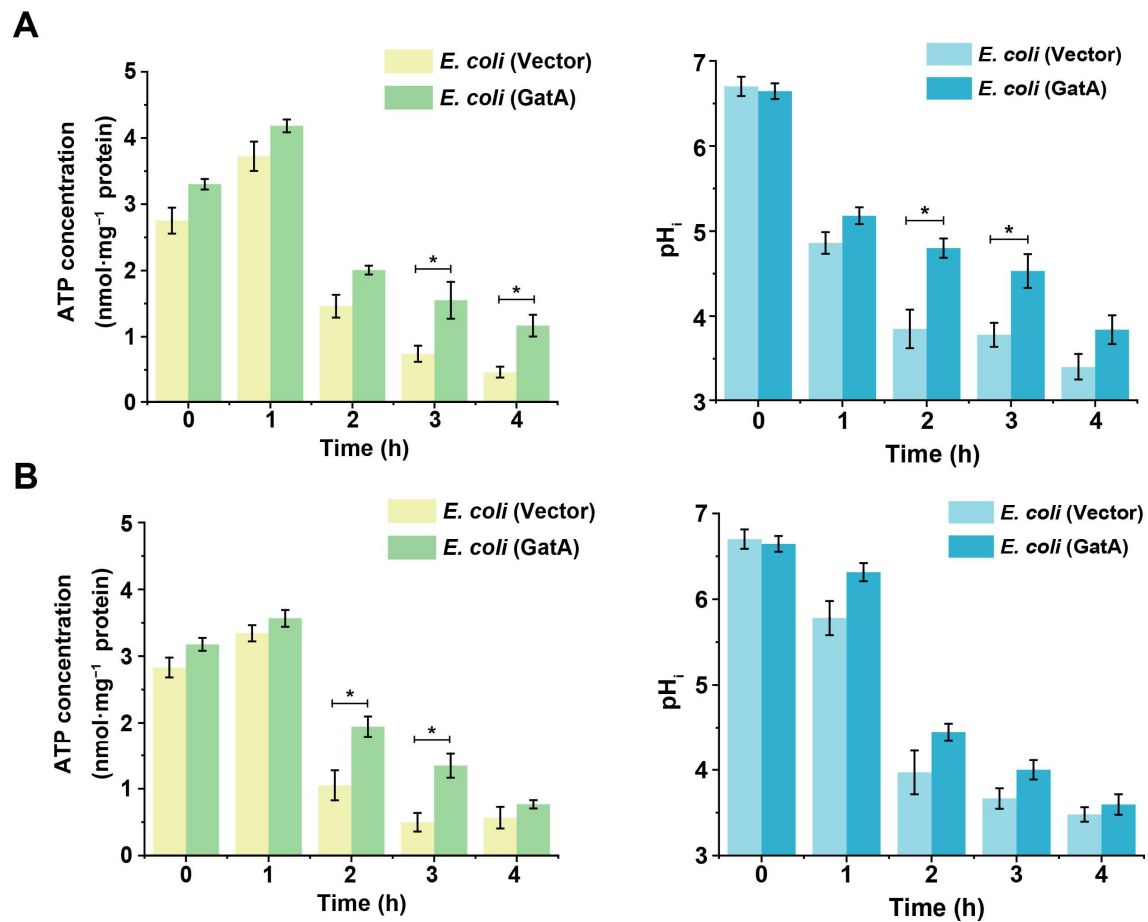

Figure S2. Intracellular ATP concentration and pH under itaconic and succinic acid lethal stress. (A) Changes in intracellular ATP concentration and pH with incubation time of the strain under itaconic acid lethal stress conditions (pH 4.2). (B) Changes in intracellular ATP concentration and pH with incubation time of the strain under succinic acid lethal stress conditions (pH 4.3). \*,  $p < 0.05$ .
